# Supplementary material for: Interstitial Lung Disease and Pulmonary Damage in Primary Sjögren’s Syndrome: A Systematic Review and Meta-Analysis
Source: MDPI journal article supplement (doi:10.3390/jcm12072586), 2023-03-29
Supplement: s1 [file s1]

**Table S1.** PRISMA checklist.

| Section/topic                      | #  | Checklist item                                                                                                                                                                                                                                                                                              | Reported on page <sup>#</sup> |
|------------------------------------|----|-------------------------------------------------------------------------------------------------------------------------------------------------------------------------------------------------------------------------------------------------------------------------------------------------------------|-------------------------------|
| <b>TITLE</b>                       |    |                                                                                                                                                                                                                                                                                                             |                               |
| Title                              | 1  | Identify the report as a systematic review, meta-analysis, or both.                                                                                                                                                                                                                                         | 1                             |
| <b>ABSTRACT</b>                    |    |                                                                                                                                                                                                                                                                                                             |                               |
| Structured summary                 | 2  | Provide a structured summary including, as applicable: background; objectives; data sources; study eligibility criteria, participants, and interventions; study appraisal and synthesis methods; results; limitations; conclusions and implications of key findings; systematic review registration number. | 1                             |
| <b>INTRODUCTION</b>                |    |                                                                                                                                                                                                                                                                                                             |                               |
| Rationale                          | 3  | Describe the rationale for the review in the context of what is already known.                                                                                                                                                                                                                              | 2                             |
| Objectives                         | 4  | Provide an explicit statement of questions being addressed with reference to participants, interventions, comparisons, outcomes, and study design (PICOS).                                                                                                                                                  | 2-3                           |
| <b>METHODS</b>                     |    |                                                                                                                                                                                                                                                                                                             |                               |
| Protocol and registration          | 5  | Indicate if a review protocol exists, if and where it can be accessed (e.g. web address), and, if available, provide registration information including registration number.                                                                                                                                |                               |
| Eligibility criteria               | 6  | Specify study characteristics (e.g. PICOS, length of follow-up) and report characteristics (e.g. years considered, language, publication status) used as criteria for eligibility, giving rationale.                                                                                                        | 3                             |
| Information sources                | 7  | Describe all information sources (e.g. databases with dates of coverage, contact with study authors to identify additional studies) in the search and date last searched.                                                                                                                                   | 3                             |
| Search                             | 8  | Present full electronic search strategy for at least one database, including any limits used, such that it could be repeated.                                                                                                                                                                               | 3                             |
| Study selection                    | 9  | State the process for selecting studies (i.e. screening, eligibility, included in systematic review, and, if applicable, included in the meta-analysis).                                                                                                                                                    | 3                             |
| Data collection process            | 10 | Describe method of data extraction from reports (e.g. piloted forms, independently, in duplicate) and any processes for obtaining and confirming data from investigators.                                                                                                                                   | 3                             |
| Data items                         | 11 | List and define all variables for which data were sought (e.g. PICOS, funding sources) and any assumptions and simplifications made.                                                                                                                                                                        | 4                             |
| Risk of bias in individual studies | 12 | Describe methods used for assessing risk of bias of individual studies (including specification of whether this was done at the study or outcome level), and how this information is to be used in any data synthesis.                                                                                      | 4                             |
| Summary measures                   | 13 | State the principal summary measures (e.g. risk ratio, difference in means).                                                                                                                                                                                                                                | 4                             |
| Synthesis of results               | 14 | Describe the methods of handling data and combining results of studies, if done, including measures of consistency (e.g. $I^2$ ) for each meta-analysis.                                                                                                                                                    | 4                             |
| Risk of bias across studies        | 15 | Specify any assessment of risk of bias that may affect the cumulative evidence (e.g. publication bias, selective reporting within studies).                                                                                                                                                                 | 5                             |
| Additional analyses                | 16 | Describe methods of additional analyses (e.g. sensitivity or subgroup analyses, meta-regression), if done, indicating which were pre-specified.                                                                                                                                                             | 5                             |
| <b>RESULTS</b>                     |    |                                                                                                                                                                                                                                                                                                             |                               |
| Study selection                    | 17 | Give numbers of studies screened, assessed for eligibility, and included in the review, with reasons for exclusions at each stage, ideally with a flow diagram.                                                                                                                                             | 6                             |
| Study characteristics              | 18 | For each study, present characteristics for which data were extracted (e.g. study size, PICOS, follow-up period) and provide the citations.                                                                                                                                                                 | 6                             |
| Risk of bias within studies        | 19 | Present data on risk of bias of each study and, if available, any outcome level assessment (see item 12).                                                                                                                                                                                                   | 7                             |
| Results of individual studies      | 20 | For all outcomes considered (benefits or harms), present, for each study: (a) simple summary data for each intervention group (b) effect estimates and confidence intervals, ideally with a forest plot.                                                                                                    | 7                             |
| Synthesis of results               | 21 | Present results of each meta-analysis done, including confidence intervals and measures of consistency.                                                                                                                                                                                                     | 7                             |
| Risk of bias across studies        | 22 | Present results of any assessment of risk of bias across studies (see Item 15).                                                                                                                                                                                                                             | 7                             |
| Additional analysis                | 23 | Give results of additional analyses, if done (e.g. sensitivity or subgroup analyses, meta-regression [see Item 16]).                                                                                                                                                                                        | 8                             |
| <b>DISCUSSION</b>                  |    |                                                                                                                                                                                                                                                                                                             |                               |
| Summary of                         | 24 | Summarise the main findings including the strength of evidence for each main outcome;                                                                                                                                                                                                                       | 8                             |

|             |    |                                                                                                                                                             |   |
|-------------|----|-------------------------------------------------------------------------------------------------------------------------------------------------------------|---|
| evidence    |    | consider their relevance to key groups (e.g. healthcare providers, users, and policy makers).                                                               |   |
| Limitations | 25 | Discuss limitations at study and outcome level (e.g. risk of bias), and at review-level (e.g. incomplete retrieval of identified research, reporting bias). | 8 |
| Conclusions | 26 | Provide a general interpretation of the results in the context of other evidence, and implications for future research.                                     | 8 |
| <hr/>       |    |                                                                                                                                                             |   |
| FUNDING     |    |                                                                                                                                                             |   |
| Funding     | 27 | Describe sources of funding for the systematic review and other support (e.g. supply of data); role of funders for the systematic review.                   | 9 |

From: Moher D, Liberati A, Tetzlaff J, Altman DG, The PRISMA Group (2009): Preferred Reporting Items for Systematic Reviews and Meta-Analyses: The PRISMA statement. *PLoS Med* 6(7): e1000097. doi:10.1371/journal.pmed1000097.

**Table S2.** MOOSE (Meta-analyses Of Observational Studies in Epidemiology) Checklist.

| Item No                                     | Recommendation                                                                                                                                                                                                                                                               | Reported on Page No |
|---------------------------------------------|------------------------------------------------------------------------------------------------------------------------------------------------------------------------------------------------------------------------------------------------------------------------------|---------------------|
| Reporting of background should include      |                                                                                                                                                                                                                                                                              |                     |
| 1                                           | Problem definition                                                                                                                                                                                                                                                           | 2                   |
| 2                                           | Hypothesis statement                                                                                                                                                                                                                                                         | 2                   |
| 3                                           | Description of study outcome(s)                                                                                                                                                                                                                                              | 3                   |
| 4                                           | Type of exposure or intervention used                                                                                                                                                                                                                                        | 3                   |
| 5                                           | Type of study designs used                                                                                                                                                                                                                                                   | 3                   |
| 6                                           | Study population                                                                                                                                                                                                                                                             | 3                   |
| Reporting of search strategy should include |                                                                                                                                                                                                                                                                              |                     |
| 7                                           | Qualifications of searchers (eg, librarians and investigators)                                                                                                                                                                                                               | 4                   |
| 8                                           | Search strategy, including time period included in the synthesis and key words                                                                                                                                                                                               | 4                   |
| 9                                           | Effort to include all available studies, including contact with authors                                                                                                                                                                                                      | 4                   |
| 10                                          | Databases and registries searched                                                                                                                                                                                                                                            | 4                   |
| 11                                          | Search software used, name and version, including special features used (eg, explosion)                                                                                                                                                                                      | 5                   |
| 12                                          | Use of hand searching (eg, reference lists of obtained articles)                                                                                                                                                                                                             | 4                   |
| 13                                          | List of citations located and those excluded, including justification                                                                                                                                                                                                        | 4                   |
| 14                                          | Method of addressing articles published in languages other than English                                                                                                                                                                                                      | 4                   |
| 15                                          | Method of handling abstracts and unpublished studies                                                                                                                                                                                                                         | 4                   |
| 16                                          | Description of any contact with authors                                                                                                                                                                                                                                      | 1                   |
| Reporting of methods should include         |                                                                                                                                                                                                                                                                              |                     |
| 17                                          | Description of relevance or appropriateness of studies assembled for assessing the hypothesis to be tested                                                                                                                                                                   | 3-4                 |
| 18                                          | Rationale for the selection and coding of data (eg, sound clinical principles or convenience)                                                                                                                                                                                | 3-4                 |
| 19                                          | Documentation of how data were classified and coded (eg, multiple raters, blinding and interrater reliability)                                                                                                                                                               | 3-4                 |
| 20                                          | Assessment of confounding (eg, comparability of cases and controls in studies where appropriate)                                                                                                                                                                             | 3-4                 |
| 21                                          | Assessment of study quality, including blinding of quality assessors, stratification or regression on possible predictors of study results                                                                                                                                   | 3-4                 |
| 22                                          | Assessment of heterogeneity                                                                                                                                                                                                                                                  | 3-4                 |
| 23                                          | Description of statistical methods (eg, complete description of fixed or random effects models, justification of whether the chosen models account for predictors of study results, dose-response models, or cumulative meta-analysis) in sufficient detail to be replicated | 3-4                 |
| 24                                          | Provision of appropriate tables and graphics                                                                                                                                                                                                                                 | 3-4                 |
| Reporting of results should include         |                                                                                                                                                                                                                                                                              |                     |
| 25                                          | Graphic summarizing individual study estimates and overall estimate                                                                                                                                                                                                          | 5                   |
| 26                                          | Table giving descriptive information for each study included                                                                                                                                                                                                                 | 5                   |
| 27                                          | Results of sensitivity testing (eg, subgroup analysis)                                                                                                                                                                                                                       | 5                   |
| 28                                          | Indication of statistical uncertainty of findings                                                                                                                                                                                                                            | 5                   |
| Item No                                     | Recommendation                                                                                                                                                                                                                                                               | Reported on Page No |
| Reporting of discussion should include      |                                                                                                                                                                                                                                                                              |                     |
| 29                                          | Quantitative assessment of bias (eg, publication bias)                                                                                                                                                                                                                       | 8                   |
| 30                                          | Justification for exclusion (eg, exclusion of non-English language citations)                                                                                                                                                                                                | 8                   |
| 31                                          | Assessment of quality of included studies                                                                                                                                                                                                                                    | 8                   |
| Reporting of conclusions should include     |                                                                                                                                                                                                                                                                              |                     |
| 32                                          | Consideration of alternative explanations for observed results                                                                                                                                                                                                               | 8                   |
| 33                                          | Generalization of the conclusions (ie, appropriate for the data presented and within the domain of the literature review)                                                                                                                                                    | 8                   |

|    |                                |   |
|----|--------------------------------|---|
| 34 | Guidelines for future research | 8 |
| 35 | Disclosure of funding source   | 8 |

From: Stroup DF, Berlin JA, Morton SC, et al, for the Meta-analysis Of Observational Studies in Epidemiology (MOOSE) Group. Meta-analysis of Observational Studies in Epidemiology. A Proposal for Reporting. *JAMA*. 2000;283(15):2008-2012. doi: 10.1001/jama.283.15.2008.

**Table S3.** Papers excluded from the analysis with the main reason.

| First author     | Year | Title                                                                                                                                                                  | Main reason for exclusion                                                                                      |
|------------------|------|------------------------------------------------------------------------------------------------------------------------------------------------------------------------|----------------------------------------------------------------------------------------------------------------|
| Strimlan         | 1976 | Pulmonary manifestations of Sjogren's syndrome                                                                                                                         | out of interest, no classification criteria listed, not primary sjogren's syndrome                             |
| Vitali C         | 1985 | Lung involvement in Sjogren's syndrome: A comparison between patients with primary and with secondary syndrome                                                         | out of interest, no classification criteria listed, not only primary sjogren's syndrome, less than 30 patients |
| Hatron, P        | 1987 | Subclinical lung inflammation in primary sjögren's syndrome. relationship between bronchoalveolar lavage cellular analysis findings and characteristics of the disease | out of interest, no classification criteria listed, less than 30 patients                                      |
| Quismorio F      | 1996 | Pulmonary involvement in primary Sjögren's syndrome                                                                                                                    | review                                                                                                         |
| Cain HC          | 1998 | Pulmonary manifestations of Sjögren's syndrome                                                                                                                         | review                                                                                                         |
| Davidson B K     | 2000 | Ten year follow up of pulmonary function in patients with primary Sjögren's syndrome                                                                                   | out of interest, concise report                                                                                |
| Kim              | 2002 | Interstitial lung diseases associated with collagen vascular diseases: Radiologic and histopathologic findings                                                         | out of interest, include patients with different autoimmune diseases                                           |
| Kanoh, S         | 2003 | Sjören's syndrome with infiltrative lung disease showing upper lung field predominance                                                                                 | case report                                                                                                    |
| Parambil, J      | 2006 | Interstitial lung disease in primary Sjögren syndrome                                                                                                                  | out of interest, less than 30 patients included                                                                |
| Parke A L        | 2008 | Pulmonary manifestations of primary Sjögren's syndrome                                                                                                                 | review                                                                                                         |
| Shi J            | 2009 | Pulmonary manifestations of sjögren's syndrome                                                                                                                         | out of interest, less than 30 patients                                                                         |
| Yazisiz, V       | 2010 | Lung involvement in patients with primary Sjögren's syndrome: What are the predictors?                                                                                 | out of interest, only 14 patients with pulmonary involvement with not enough data                              |
| Nikpour, M       | 2010 | Interstitial Lung Disease in Sjogrens Syndrome                                                                                                                         | review                                                                                                         |
| Hatron, P        | 2011 | Pulmonary manifestations of Sjögren's syndrome                                                                                                                         | review                                                                                                         |
| Tomita, Y        | 2012 | Rapidly progressive pulmonary fibrosis following the onset of diffuse alveolar hemorrhage in Sjögren's syndrome: An autopsy case report                                | case report                                                                                                    |
| Stojan, G        | 2013 | Pulmonary Manifestations of Sjögren's Syndrome                                                                                                                         | review                                                                                                         |
| Palm, Ø          | 2013 | Clinical pulmonary involvement in primary Sjögren's syndrome: Prevalence, quality of life and mortality - A retrospective study based on registry data                 | out of interest, the pulmonary involvement is not detailed                                                     |
| Yeh J            | 2014 | Association between sjogren's syndrome and respiratory failure: Put airway, interstitia, and vessels close together: A national cohort study                           | out of interest, not enough data on pulmonary involvement                                                      |
| Kreider M        | 2014 | Pulmonary involvement in Sjögren syndrome                                                                                                                              | review                                                                                                         |
| Enomoto, Y       | 2014 | Features of usual interstitial pneumonia in patients with primary Sjögren's syndrome compared with idiopathic pulmonary fibrosis                                       | out of interest, comparison between UIP in pSS and IPF                                                         |
| Mira-Avendano, I | 2015 | Pulmonary manifestations of Sjögren syndrome, systemic lupus erythematosus, and mixed connective tissue disease                                                        | review                                                                                                         |
| Flament, T       | 2016 | Pulmonary manifestations of Sjögren's syndrome                                                                                                                         | review                                                                                                         |
| Roca F           | 2017 | Interstitial lung disease in primary Sjögren's syndrome.                                                                                                               | out of interest,                                                                                               |

|                      |      | Review                                                                                                                                                                                       |                  |
|----------------------|------|----------------------------------------------------------------------------------------------------------------------------------------------------------------------------------------------|------------------|
| Vasco, P             | 2017 | Assessment of interstitial lung disease in Sjögren's syndrome by lung ultrasound: a pilot study out of interest.<br>of correlation with high-resolution chest tomography<br>than 30 patients | Less             |
| Sebastian A          | 2017 | Chest HRCT findings in patients with primary Sjögren's syndrome.<br>out of interest, data only in patients with pulmonary involvement                                                        |                  |
| Strevens Bolmgren, V | 2017 | Respiratory symptoms are poor predictors of concomitant chronic obstructive pulmonary disease in patients with primary Sjögren's syndrome<br>Only data on COPD are reported                  | out of interest  |
| McCoy, S             | 2017 | Sjögren's syndrome-associated lung disease.                                                                                                                                                  | review           |
| Lopez Velazquez, M   | 2018 | Pulmonary manifestations of systemic lupus erythematosus and Sjögren's syndrome                                                                                                              | review           |
| Jin, Y               | 2019 | Clinical profile and associated factors of pulmonary involvement in primary Sjögren's syndrome out of interest,<br>not data on ILD and ILD pattern                                           |                  |
| Natalini, J          | 2019 | Pulmonary Involvement in Sjögren Syndrome                                                                                                                                                    | review           |
| Gupta, S             | 2019 | Pulmonary manifestations of primary sjögren's syndrome: Underlying immunological mechanisms, clinical presentation, and management                                                           | review           |
| Kamiya, Y            | 2019 | Prognostic factors for primary Sjögren's syndrome-associated interstitial lung diseases                                                                                                      | review           |
| Chung, A             | 2019 | Pulmonary and Bronchiolar Involvement in Sjogren's Syndrome                                                                                                                                  | review           |
| Gupta, S             | 2019 | Pulmonary manifestations of primary sjögren's syndrome: Underlying immunological mechanisms, clinical presentation, and management.                                                          | review           |
| Posso-Osorio, I      | 2019 | Pulmonary involvement as the initial manifestation in primary Sjögren's case report<br>syndrome                                                                                              |                  |
| Sambataro, D         | 2020 | Patients with interstitial lung disease secondary to autoimmune diseases: How to recognize them? re-view                                                                                     |                  |
| Amlani, B            | 2020 | Treatment of primary sjögren's syndrome-related interstitial lung disease: A retrospective cohort study out of interest, only 19 patients                                                    |                  |
| Heus, A.             | 2020 | Pulmonary involvement in primary Sjögren's syndrome, as measured by the ESSDAI.<br>out of interest, pulmonary involvement assumed to be related to pSS.                                      |                  |
| Alhamad, E           | 2021 | Clinical characteristics and outcomes in patients with primary Sjogren's syndrome-associated out of interest,<br>interstitial lung disease<br>patients selected for ILD presence             |                  |
| Manfredi A.          | 2021 | Fibrosing interstitial lung disease in primary Sjogren syndrome<br>patients selected for ILD presence                                                                                        | out of interest, |
| Peredo, R            | 2021 | Sjogren's Syndrome and Pulmonary Disease                                                                                                                                                     | review           |
| Ottaviani, S.        | 2022 | Rheumatological evaluation of patients with interstitial lung disease<br>out of interest, not specific for pSS                                                                               |                  |

**Table S4.** Newcastle-Ottawa Assessment Scale for case-control studies.

| Study                  | Selection           |                             |                       | Comparability          |                     |                       |                        | Exposure                                             |   |             |
|------------------------|---------------------|-----------------------------|-----------------------|------------------------|---------------------|-----------------------|------------------------|------------------------------------------------------|---|-------------|
|                        | Definition of cases | Representativeness of cases | Selection of controls | Definition of controls | On age risk factors | On other risk factors | Assessment of exposure | Same methods of ascertainment for cases and controls | N | Total score |
| - Taouli et al, 2002   | ★                   | ★                           | ★                     | ★                      | ☆                   | ★                     | ★                      | ★                                                    | ☆ | 7           |
| - Lin et al, 2010      | ★                   | ★                           | ☆                     | ☆                      | ★                   | ★                     | ★                      | ★                                                    | ☆ | 6           |
| - Botsios et al, 2011  | ★                   | ★                           | ★                     | ★                      | ★                   | ★                     | ★                      | ★                                                    | ☆ | 8           |
| - Ter Borg et al, 2014 | ★                   | ☆                           | ☆                     | ☆                      | ★                   | ★                     | ☆                      | ★                                                    | ☆ | 5           |

|                                |   |   |   |   |   |   |   |   |   |   |   |   |
|--------------------------------|---|---|---|---|---|---|---|---|---|---|---|---|
| - Kvarnstrom et al, 2015       | ★ | ☆ | ☆ | ☆ | ★ | ★ | ★ | ★ | ★ | ★ | ★ | 6 |
| - Li et al, 2015               | ★ | ★ | ★ | ★ | ★ | ★ | ★ | ★ | ★ | ★ | ★ | 9 |
| - Zhao et al, 2015             | ★ | ☆ | ☆ | ☆ | ☆ | ☆ | ☆ | ☆ | ☆ | ☆ | ☆ | 6 |
| - Manfredi et al, 2017         | ★ | ★ | ★ | ★ | ★ | ★ | ★ | ★ | ★ | ★ | ★ | 8 |
| - Gao et al, 2018              | ★ | ☆ | ★ | ★ | ★ | ★ | ★ | ★ | ★ | ☆ | ★ | 7 |
| -Kakugawa et al, 2018          | ★ | ☆ | ★ | ★ | ★ | ★ | ★ | ★ | ★ | ☆ | ★ | 7 |
| - Wang et al, 2018             | ★ | ☆ | ★ | ★ | ★ | ★ | ★ | ★ | ★ | ☆ | ★ | 7 |
| - Kampolis et al, 2018         | ★ | ☆ | ★ | ★ | ★ | ★ | ★ | ★ | ★ | ☆ | ★ | 7 |
| - Guisado-Vasco et al, 2019    | ★ | ☆ | ★ | ★ | ★ | ★ | ★ | ★ | ★ | ☆ | ★ | 7 |
| - Sogkas et al, 2020           | ★ | ★ | ★ | ★ | ★ | ★ | ★ | ★ | ★ | ☆ | ★ | 8 |
| - Shi et al, 2020              | ★ | ★ | ★ | ★ | ★ | ★ | ★ | ★ | ★ | ★ | ★ | 9 |
| - Ufuk et al, 2020             | ★ | ★ | ★ | ★ | ★ | ★ | ★ | ★ | ★ | ★ | ★ | 9 |
| - Sahin Ozdemirel T et al 2021 | ★ | ★ | ★ | ★ | ★ | ★ | ★ | ★ | ★ | ★ | ★ | 9 |
| - Lin et al, 2022              | ★ | ★ | ★ | ★ | ★ | ★ | ★ | ★ | ★ | ★ | ★ | 9 |
| - Weng et al, 2022             | ★ | ★ | ★ | ★ | ★ | ★ | ★ | ★ | ★ | ★ | ★ | 9 |
| - Özdemir Işık et al, 2022     | ★ | ★ | ★ | ★ | ★ | ★ | ★ | ★ | ★ | ☆ | ★ | 8 |

**Table S5.** Quality assessment of the included studies without the control group.

| Study                         | Quality Assessment | Item 1 | Item 2 | Item 3 | Item 4         | Item 5         | Item 6       | Item 7 | Item 8 | Item 9       | Item 10 | Item 11 | Item 12 |
|-------------------------------|--------------------|--------|--------|--------|----------------|----------------|--------------|--------|--------|--------------|---------|---------|---------|
| Constantopoulos et al, 1985   | Poor               | No     | Yes    | No     | No             | Not applicable | Not reported | No     | No     | Not reported | Yes     | No      | No      |
| Papathanasiou et al, 1986     | Poor               | No     | No     | No     | Not applicable | Not applicable | No           | No     | No     | Not reported | No      | No      | No      |
| Papiris et al, 1999           | Poor               | Yes    | No     | No     | Not applicable | Not applicable | No           | No     | No     | Not reported | Yes     | Yes     | No      |
| Cervera et al, 2000           | Fair               | Yes    | Yes    | No     | Yes            | Not applicable | No           | Yes    | No     | Not reported | Yes     | Yes     | No      |
| Roca et al, 2017              | Poor               | Yes    | No     | No     | No             | Not applicable | No           | No     | No     | Not reported | No      | No      | No      |
| Strevens Bolmgren et al, 2017 | Fair               | No     | Yes    | No     | No             | Not applicable | Yes          | Yes    | No     | Not reported | Yes     | Yes     | No      |
| Ter Borg et al, 2017          | Poor               | Yes    | No     | No     | Not applicable | Not applicable | No           | No     | No     | Not reported | Yes     | Yes     | No      |
| Dong et al, 2018              | Fair               | Yes    | Yes    | No     | Yes            | Not applicable | No           | No     | No     | Not reported | Yes     | Yes     | No      |

Quality Assessment Tool for Before-After (Pre-Post) Studies with No Control Group proposed by the National Heart, Lung, and Blood Institute - US Department of Health & Human Services (<https://www.nhlbi.nih.gov/health-pro/guidelines/in-develop/cardiovascular-risk-reduction/tools/before-after>).

**Table S6.** Leave-one-out test.

| Study                         | Coefficient | SE     | Z value | P value | 95% CI    |
|-------------------------------|-------------|--------|---------|---------|-----------|
| Constantopoulos et al, 1985   | 0.23        | 0.0345 | 6.65    | <0.0001 | 0.16-0.29 |
| Papathanasiou et al, 1986     | 0.22        | 0.0342 | 6.60    | <0.0001 | 0.16-0.30 |
| Papiris et al, 1999           | 0.24        | 0.0343 | 6.86    | <0.0001 | 0.17-0.30 |
| Cervera et al, 2000           | 0.24        | 0.0338 | 7.05    | <0.0001 | 0.17-0.30 |
| Taouli et al, 2002            | 0.24        | 0.0341 | 6.95    | <0.0001 | 0.17-0.30 |
| Lin et al, 2010               | 0.23        | 0.0346 | 6.71    | <0.0001 | 0.17-0.30 |
| Botsios et al, 2011           | 0.23        | 0.0348 | 6.62    | <0.0001 | 0.16-0.30 |
| Ter Borg et al, 2014          | 0.23        | 0.0345 | 6.60    | <0.0001 | 0.16-0.30 |
| Kvarnstrom et al, 2015        | 0.23        | 0.0343 | 6.60    | <0.0001 | 0.16-0.29 |
| Li et al, 2015                | 0.23        | 0.0348 | 6.64    | <0.001  | 0.16-0.29 |
| Zhao et al, 2015              | 0.24        | 0.0338 | 7.04    | <0.0001 | 0.17-0.30 |
| Manfredi et al, 2017          | 0.24        | 0.0342 | 6.88    | <0.0001 | 0.17-0.30 |
| Ramirez Sepulveda et al, 2017 | 0.23        | 0.0347 | 6.65    | <0.0001 | 0.16-0.30 |
| Roca et al, 2017              | 0.23        | 0.0345 | 6.79    | <0.0001 | 0.17-0.30 |

|                                      |      |        |      |         |           |
|--------------------------------------|------|--------|------|---------|-----------|
| <b>Strevens Bolmgren et al, 2017</b> | 0.23 | 0.0346 | 6.72 | <0.0001 | 0.16-0.30 |
| <b>Ter Borg et al, 2017</b>          | 0.24 | 0.0343 | 6.87 | <0.0001 | 0.17-0.30 |
| <b>Dong et al, 2018</b>              | 0.23 | 0.0345 | 6.79 | <0.0001 | 0.17-0.30 |
| <b>Gao et al, 2018</b>               | 0.22 | 0.0342 | 6.56 | <0.0001 | 0.16-0.29 |
| <b>Kakugawa et al, 2018</b>          | 0.23 | 0.0347 | 6.67 | <0.0001 | 0.16-0.30 |
| <b>Wang et al, 2018</b>              | 0.23 | 0.0345 | 6.58 | <0.0001 | 0.16-0.30 |
| <b>Kampolis et al, 2018</b>          | 0.21 | 0.0274 | 7.58 | <0.0001 | 0.15-0.26 |
| <b>Guisado-Vasco et al, 2019</b>     | 0.24 | 0.0338 | 7.03 | <0.0001 | 0.17-0.30 |
| <b>Sogkas et al, 2020</b>            | 0.23 | 0.0344 | 6.57 | <0.0001 | 0.16-0.29 |
| <b>Shi et al, 2020</b>               | 0.22 | 0.0325 | 6.73 | <0.0001 | 0.16-0.28 |
| <b>Sahin Ozdemirel et al, 2021</b>   | 0.24 | 0.0340 | 6.95 | <0.001  | 0.17-0.30 |
| <b>Lin et al, 2022</b>               | 0.23 | 0.0347 | 6.67 | <0.0001 | 0.16-0.30 |
| <b>Weng et al, 2022</b>              | 0.22 | 0.0333 | 6.64 | <0.0001 | 0.16-0.29 |
| <b>Özdemir Işık et al, 2022</b>      | 0.23 | 0.0345 | 6.77 | <0.0001 | 0.17-0.30 |
